# Supplementary material for: Herd-Level Mastitis-Associated Costs on Canadian Dairy Farms
Source: PubMed Central journal article supplement (PMC5961536; doi:10.3389/fvets.2018.00100), 2018-05-14
Supplement: Table1.pdf [file Table1.pdf]

## APPENDIX A

| Component            | Equation |                                                                                                                                                                                                                            |
|----------------------|----------|----------------------------------------------------------------------------------------------------------------------------------------------------------------------------------------------------------------------------|
| Milk yield reduction | Eq. 1    | Amount of herd milk loss due to CM = number of CM cases × 0.05 <sup>a</sup> × mean cow daily milk production × 305 <sup>b</sup>                                                                                            |
|                      | Eq. 2    | Costs of milk loss due to CM = amount of herd milk loss due to CM × 0.78 <sup>c</sup>                                                                                                                                      |
|                      | Eq. 3    | Average linear score of individual cow SCC in herd = (Log10(BMSCC) -1.6)/0.24 <sup>d</sup>                                                                                                                                 |
|                      | Eq. 4    | Amount of milk loss due to SCM=number of milking cows×190 <sup>d</sup> × (Average linear score of individual cow SCC in herd -1)                                                                                           |
|                      | Eq. 5    | Costs of milk loss due to SCM = Amount of milk loss due to SCM×0.78 <sup>c</sup>                                                                                                                                           |
| Drug                 | Eq. 6    | Cost of drugs for total local treatment= mean price of used intramammary infusions per quarter per day × days of treatment × frequency of treatments per day                                                               |
|                      | Eq. 7    | Cost of drugs to treat <b>mild</b> to <b>moderate</b> CM = number of CM cases × 0.8 <sup>e</sup> × proportion of CM cases receiving treatment × cost of drugs for total local treatment                                    |
|                      | Eq. 8    | Cost of drugs to treat <b>severe</b> CM = number of CM cases × 0.2 <sup>e</sup> × proportion of CM cases receiving treatment × (cost of drugs for total local treatment + 25.4 <sup>f</sup> )                              |
|                      | Eq. 9    | Total cost of CM treatment= Cost of drugs to treat <b>mild</b> to <b>moderate</b> CM + Cost of drugs to treat <b>severe</b> CM                                                                                             |
| Discarded milk       | Eq. 10   | Amount of milk discarded for <b>treated</b> CM = number of CM cases × Proportion of CM cases treated × (duration of treatment + mean withdrawal time) × average daily milk production per cow                              |
|                      | Eq. 11   | Amount of milk discarded for <b>untreated</b> CM = Number of CM cases × (1- Proportion of CM cases treated) × number of days before milk is put back in bulk tank × average daily milk production per cow                  |
|                      | Eq. 12   | Total amount of milk discarded in CM cases (treated + untreated) = Amount of milk discarded for <b>treated</b> CM + Amount of milk discarded for <b>untreated</b> CM                                                       |
|                      | Eq. 13   | Economic impact of discarding milk in CM cases = (total amount of milk discarded in CM cases × 0.78 <sup>c</sup> ) – (% of discarded milk used to feed calves × total amount of milk discarded in CM × 0.49 <sup>g</sup> ) |
|                      | Eq. 14   | Amount of milk discarded for SCM = Number of cows excluded from bulk tank for high SCC × number of days of this exclusion × mean daily milk production per cow                                                             |
|                      | Eq.15    | Economic value of discarding milk in SCM cases = (Amount of milk discarded for SCM × 0.78 <sup>c</sup> ) – (Amount of milk discarded for SCM × 0.49 <sup>g</sup> )                                                         |
| Veterinary services  | Eq.16    | Cost of veterinary services for CM = number of CM cases × proportion of CM cases for which veterinarian is called × average cost for a veterinary visit                                                                    |

| Component                                       | Equation |                                                                                                                                                                                                                                                                                                                                                   |
|-------------------------------------------------|----------|---------------------------------------------------------------------------------------------------------------------------------------------------------------------------------------------------------------------------------------------------------------------------------------------------------------------------------------------------|
|                                                 | Eq.17    | Cost of veterinary services for herd <b>SCC</b> management = total expenditures on professional advices about herd mastitis issue                                                                                                                                                                                                                 |
| Labor                                           | Eq.18    | Cost of labor to manage CM = number of CM cases × time spent working on a CM case (diagnostic, initial treatment, follow-up treatment, separate milking) × 34.5 <sup>i</sup>                                                                                                                                                                      |
| Product quality                                 | Eq.19    | Cost of milk quality = yearly payment for insurance in case there is an insurance coverage + penalty payment for exceeding SCC limit + premium loss for exceeding SCC limit                                                                                                                                                                       |
| Diagnostic                                      | Eq.20    | Cost of diagnostic procedure for <b>CM</b> = number of samples collected in a year for CM × cost of each sample                                                                                                                                                                                                                                   |
|                                                 | Eq.21    | Cost of diagnostic procedure for <b>SCM</b> = number of samples collected in a year for SCM cases × cost of each sample                                                                                                                                                                                                                           |
| Culling and mortality                           | Eq.22    | Economic value of <b>culling</b> of <b>1st</b> lactation cows for <b>CM</b> = Number of 1st lactation cows culled due to CM × (costs for rearing or buying a 1st lactation cow - money received for meat or milk sale)                                                                                                                            |
|                                                 | Eq.23    | Economic value of <b>1st</b> lactation cows <b>dying</b> from <b>CM</b> = Number of 1st lactation cows that died due to CM × (costs for rearing or buying a 1st lactation cow + money spent for carcass disposal)                                                                                                                                 |
|                                                 | Eq.24    | Economic value of <b>culling</b> of <b>older</b> cows for <b>CM</b> = Number of older cows culled due to CM × (1.3 <sup>h</sup> × costs for rearing or buying a 1st lactation cow - money received for meat or milk sale)                                                                                                                         |
|                                                 | Eq.25    | Economic value of <b>older</b> cows <b>dying</b> from <b>CM</b> = Number of older cows that died due to CM × (1.3 <sup>h</sup> × costs for rearing or buying a 1st lactation cow + money spent for carcass disposal)                                                                                                                              |
|                                                 | Eq.26    | Economic value of <b>culling 1st</b> lactation cows due to <b>SCM</b> = Number of 1st lactation cows culled due to SCM × (costs for rearing or buying a 1st lactation cow - money received for meat or milk sale)                                                                                                                                 |
|                                                 | Eq.27    | Economic value of <b>culling older</b> cows due to <b>SCM</b> = Number of older cows culled due to SCM × (1.3 <sup>h</sup> × costs for rearing or buying a 1st lactation cow - money received for meat or milk sale)                                                                                                                              |
| Materials and investments (with required labor) | Eq.28    | Economic value of required labor for pre-milking teat disinfection in 12 months = number of milking cows × (4/3600) <sup>j</sup> × 2 <sup>k</sup> × 365 <sup>l</sup> × 34.5 <sup>i</sup>                                                                                                                                                          |
|                                                 | Eq.29    | Economic value of required labor for post-milking teat disinfection in 12 months = number of milking cows × (4/3600) <sup>j</sup> × 2 <sup>k</sup> × 365 <sup>l</sup> × 34.5 <sup>i</sup>                                                                                                                                                         |
|                                                 | Eq.30    | Economic value of required labor for dry cow therapy in 12 months = number of milking cows × 0.8 <sup>m</sup> × (2/60) <sup>n</sup> × 34.5 <sup>i</sup>                                                                                                                                                                                           |
|                                                 | Eq.31    | Cost of pre-milking teat disinfection in 12 months + Economic value of required labor for pre-milking teat disinfection + Cost of post-milking teat disinfection in 12 months + Economic value of required labor for post-milking teat disinfection + Cost of dry cow therapy in 12 months + Economic value of required labor for dry cow therapy |

| Component | Equation                                                                                  |
|-----------|-------------------------------------------------------------------------------------------|
|           | + Cost of gloves used during milking in 12 months + Cost of mastitis vaccine in 12 months |

All costs were multiplied by 100 and divided by number of milking cows to report value for a herd of 100 milking cows. Values were mostly obtained from producers through questionnaires except for factors with superscripts explained in following footnotes:

<sup>a</sup> (Seegers et al., 2003b)

<sup>b</sup> Days in 1 lactation

<sup>c</sup> Cost of producing 1 litre of milk in 2015 in Canadian dollar (Canadian Dairy Commission, 2015)

<sup>d</sup> (Fetrow et al., 1988)

<sup>e</sup> Proportion of mild to moderate versus severe CM among all CM cases (database of NCDF)

<sup>f</sup> Minimum additional cost of treatment for severe CM cases was considered 3 doses of trimethoprim /sulfamethoxazole as systemic antimicrobial and 1 dose of flunixin meglumine as anti-inflammatory drug for a cow with average body weight

<sup>g</sup> Mean cost of 1 litre reconstituted milk replacers for calves based on mixing directions and cost of used brands

<sup>h</sup> Average ratio of second to first parity lactational curve coefficients (Friggens et al., 1999)

<sup>i</sup> Hourly wage (Statistics Canada, 2015)

<sup>j</sup> Required time in hours for disinfection of all teats of 1 cow

<sup>k</sup> Assumed number of herd milking times per 24 hours

<sup>l</sup>Number of days per year

<sup>m</sup>Proportion of cows which were dried off in a herd per year

<sup>n</sup>Required time in hours to administer dry cow therapy for 1 cow (van Soest et al., 2016)
