# Supplementary material for: Herd-Level Mastitis-Associated Costs on Canadian Dairy Farms
Source: PubMed Central journal article supplement (PMC5961536; doi:10.3389/fvets.2018.00100), 2018-05-14
Supplement: Table2.pdf [file Table2.pdf]

## APPENDIX B

### Economic of mastitis questionnaire

#### General

1. How many milking cows do you currently have? \_\_\_\_\_ cows
2. What is the cow average daily milk production on your farm? \_\_\_\_\_ kg/day
3. How much does it cost to rear or buy a first lactation cow? \_\_\_\_\_ \$
4. Do you use milk replacer to feed the calves?
  - No – if No, please proceed to question 5
  - Yes
    - 4.a. What brand of milk placer did you use during last 12 months? \_\_\_\_\_
    - 4.b. What are the costs per kilogram of milk replacer? \_\_\_\_\_ \$/Kg powder
5. During the last 12 months, how much did you spend on these items to prevent mastitis?
  - 5.a. Pre milking teat-disinfection solution \_\_\_\_\_ \$/year
  - 5.b. Post milking teat-disinfection solution \_\_\_\_\_ \$/year
  - 5.c. Dry cow therapy \_\_\_\_\_ \$/year
  - 5.d. Milking machine maintenance (regular inspection by technician, replacing parts and liners) \_\_\_\_\_ \$/year
  - 5.e. Gloves for milking personnel \_\_\_\_\_ \$/year
  - 5.f. Towels for drying teats during milking \_\_\_\_\_ \$/year
  - 5.g. Vaccine against mastitis (costs for vaccine and administration) \_\_\_\_\_ \$/year
6. was your farm participating in Dairy Herd Improvement (DHI) control in last 12 months?
  - No – if No, please proceed to question 7
  - Yes
    - 6.a. How many controls in the last 12 months? \_\_\_\_\_ controls / year
    - 6.b. If it was not from SCC measurements, would you still use DHI control?
      - No
      - Yes

#### Clinical mastitis

**In the current questionnaire clinical mastitis is defined as: a cow with abnormal milk (flakes, watery...) with or without a swollen udder, fever, loss of appetite...**

7. How many cases of clinical mastitis did you have in the last 12 months?  
\_\_\_\_\_ CM cases

8. On your farm, what proportion of cows with clinical mastitis is treated with drugs?  
\_\_\_\_\_ %

9. What drugs are used to treat a typical clinical mastitis case on your farm?

| Antibiotics                                       | Anti-inflammatory (if any)                         |
|---------------------------------------------------|----------------------------------------------------|
| <input type="radio"/> 17900 special formula forte | <input type="radio"/> Anafen                       |
| <input type="radio"/> Cefa-lak                    | <input type="radio"/> Metacam                      |
| <input type="radio"/> Pirsue                      | <input type="radio"/> Banamine, Flunixin, Cronyxin |
| <input type="radio"/> Spectramast LC              | <input type="radio"/> Dexamethazone                |
| <input type="radio"/> Other: _____                | <input type="radio"/> Flucort                      |
|                                                   | <input type="radio"/> Predef 2X                    |
|                                                   | <input type="radio"/> Other: _____                 |

10. How many times per day and for how long is the antibiotic administered?

\_\_\_\_\_ times per day, for \_\_\_\_\_ days

11. What is the cost of your typical clinical mastitis treatment?

\_\_\_\_\_ \$/ treatment (complete whole treatment)

12. How much time do the farm personnel spend working on a typical clinical mastitis case (initial and follow-up treatments, separate milking, etc)? \_\_\_\_\_ hours

13. For clinical mastitis cases that are not treated, on average for how many days do you discard the milk? \_\_\_\_\_ days

Not Applicable

14. What proportion of discarded milk from cows with clinical mastitis is used to feed the calves? \_\_\_\_\_ %

15. In what proportion of clinical mastitis cases do you call a veterinarian?

\_\_\_\_\_ %

16. On average what are the costs of the veterinarian when called for a clinical mastitis case (without cost of drugs)? \_\_\_\_\_ \$

17. How many milk samples were collected and analyzed (sent to the lab or analyzed on-farm) for clinical mastitis cases in the last 12 months?

\_\_\_\_\_ samples/year

18. How much do the laboratory tests cost? \_\_\_\_\_\$/test

19. How many 1st lactation and older cows were culled or died due to clinical mastitis in the last 12 months?

\_\_\_\_\_ 1st lactation cows culled

\_\_\_\_\_ 1st lactation cows died

\_\_\_\_\_ older cows culled

\_\_\_\_\_ older cows died

20. When culling a cow with clinical mastitis on average how much money is received for meat or milk sale? \_\_\_\_\_\$

21. How much money is spent on carcass disposal in case a cow dies from CM?  
\_\_\_\_\_ \$

22. Do you have insurance coverage for antimicrobial residue in the bulk tank?

Yes

No

23. If yes, what is the cost of this insurance? \_\_\_\_\_\$/year

### **Somatic cell count**

24. What was your average bulk milk somatic cell count in the last 12 months?  
\_\_\_\_\_ x 1,000 cells/ml

25. How much did you lose as penalty for exceeding the SCC limit in the last 12 months? \_\_\_\_\_\$

26. How many milk samples were collected and analyzed (sent to the lab or analyzed on-farm) for high SCC cows in the last 12 months?  
\_\_\_\_\_ samples/year

27. How many cows were excluded from bulk tank because of high SCC in last 12 months? \_\_\_\_\_ cows

28. For how many days on average did you exclude milk from these cows?  
\_\_\_\_\_ days

29. Is there a premium in your province for milk quality?

- Yes  
 No

30. How much did you spend in the last 12 months for professional advices concerning udder health issues different than treatment of a clinical mastitis case (e.g. routine monitoring, outbreak investigation, high SCC problems)?

\_\_\_\_\_ \$/an

31. How many 1st lactation and older cows were culled due to high SCC last year?  
\_\_\_\_\_ 1<sup>st</sup> lactation

\_\_\_\_\_ older cows

32. How much money was received for meat or milk sale for cows culled because of high SCC? \_\_\_\_\_ \$/cow

Thank you for your time, in completing this questionnaire

**Simon Dufour, DMV, Ph.D.**

Professeur / Professor

Département de pathologie et microbiologie

Faculté de médecine vétérinaire, Université de Montréal

Directeur scientifique / Scientific Director

Réseau canadien de recherche sur la mammite bovine et la qualité du lait

Canadian Bovine Mastitis and Milk Quality Research Network

 450 773-8521 ext. 8605

 450 778-8128

[simon.dufour@umontreal.ca](mailto:simon.dufour@umontreal.ca)

[www.resecumammite.org](http://www.resecumammite.org) / [www.mastitisnetwork.org](http://www.mastitisnetwork.org)

C.P. 5000 Saint-Hyacinthe (Québec) CANADA J2S 7C6

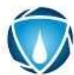

Réseau canadien de  
recherche sur la mammite  
bovine et la qualité du lait  
Canadian Bovine Mastitis and  
Milk Quality Research Network
